# Supplementary material for: ATG4 Mediated Psm ES4326/AvrRpt2-Induced Autophagy Dependent on Salicylic Acid in Arabidopsis Thaliana
Source: PubMed Central journal article supplement (PMC7404177; doi:10.3390/ijms21145147), 2020-07-21
Supplement: ijms-21-05147-s001.pdf [file ijms-21-05147-s001.pdf]

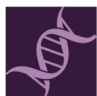

Supplementary data

Figure S1

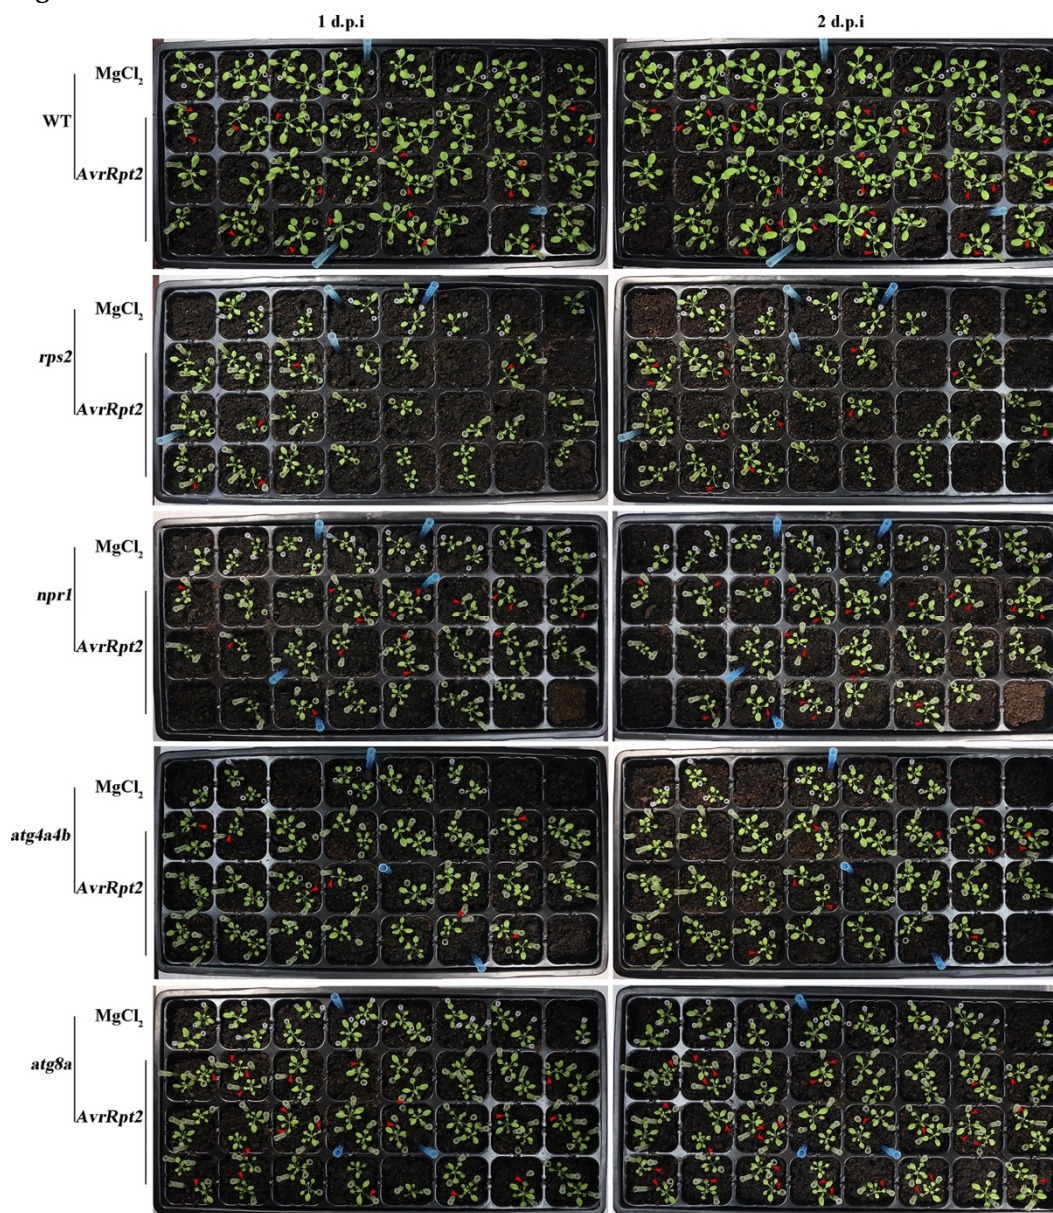

phenotypes of WT, *rps2*, *npr1*, *atg4a4b* and *atg8a* after *Psm ES4326/avrRpt2* infiltration for 1 or 2 days. The red arrow showed the leaves with HR phenotype.

Table S1 Primers for several genes.

| gene name                   | sequence (5'→3')        |
|-----------------------------|-------------------------|
| <i>AtATG1</i> (AT3G61960)   | F: ATTTGAATTCACCTGCACCA |
|                             | R: GGCAGCACTTGTTTCGTTTA |
| <i>AtATG6</i> (AT3G61710.1) | F: TTGCAAATTCAAAGGACCAA |

|                              |                               |
|------------------------------|-------------------------------|
|                              | R: TGGTCCAACCTCTCTTGCTTG      |
| <i>AtATG8a</i> (AT4G21980.1) | F: AAGCTTGGAGCTGAGAAAGC       |
|                              | R: GGAACCCATCCTCATCTTTG       |
| <i>ICS1</i> (AT1G74710.2)    | F: GGCAGGGAGACTTACG           |
|                              | R: AGGTCCCGCATAACATT          |
| <i>NPR1</i> (AT1G64280.1)    | F: CAATTCATCGGAACCTGTTG       |
|                              | R: GAGGAGTCGGTGTTATCGGT       |
| <i>PR1</i> (AT2G14610)       | F:CTCAAGATAGCCCACAAGAT        |
|                              | R:GCGTAGTTGTAGTTAGCCTTCT      |
| <i>EDS1</i> (AT3G48090)      | F:CCAATTGGATCCCAGAAAGT        |
|                              | R:AACAGCTTGGTTTGCAACAG        |
| <i>ubiquitin 5</i>           | F:GCCGAAGAAGATCAAGCACAAGCA    |
|                              | R:TCGATGGATCTGGAAAGGTTTCAGCGT |
| <i>AtACTIN2</i>              | F: GGTAACATTGTGCTCAGTGGTGG    |
|                              | R: AACGACCTTAATCTTCATGCTGC    |

---
